# Supplementary material for: Quantitative E. coli Enzyme Detection in Reporter Hydrogel-Coated Paper Using a Smartphone Camera
Source: PubMed Central journal article supplement (PMC7833396; doi:10.3390/bios11010025), 2021-01-19
Supplement: biosensors-11-00025-s001.pdf [file biosensors-11-00025-s001.pdf]

# Quantitative *E. Coli* Enzyme Detection in Reporter Hydrogel-Coated Paper Using a Smartphone Camera

Kawaljit Kaur <sup>1,†</sup>, Winny Chelangat <sup>1,2,†</sup>, Sergey I. Druzhinin <sup>1,\*</sup>, Nancy Wangechi Karuri <sup>3</sup>, Mareike Müller <sup>1</sup> and Holger Schönherr <sup>1,\*</sup>

- <sup>1</sup> Physical Chemistry I & Research Center of Micro and Nanochemistry and Engineering (Cμ), Department of Chemistry and Biology, University of Siegen, Adolf-Reichwein-Straße 2, 57076 Siegen, Germany; Kawaljit.Kaur@uni-siegen.de (K.K.); chelangat.winny16@students.dkut.ac.ke (W.C.); m.mueller@chemie-bio.uni-siegen.de (M.M.)
- <sup>2</sup> Mechatronics Engineering Department, Dedan Kimathi University of Technology, Nyeri-Mweiga Road, 10143 Nyeri, Kenya
- <sup>3</sup> Chemical Engineering Department, Dedan Kimathi University of Technology, Nyeri-Mweiga Road, 10143 Nyeri, Kenya; nancy.karuri@dkut.ac.ke
- <sup>†</sup> These authors contributed equally to this work.
- <sup>\*</sup> Correspondence: druzhinin@chemie.uni-siegen.de (S.I.D.); schoenherr@chemie.uni-siegen.de (H.S.)

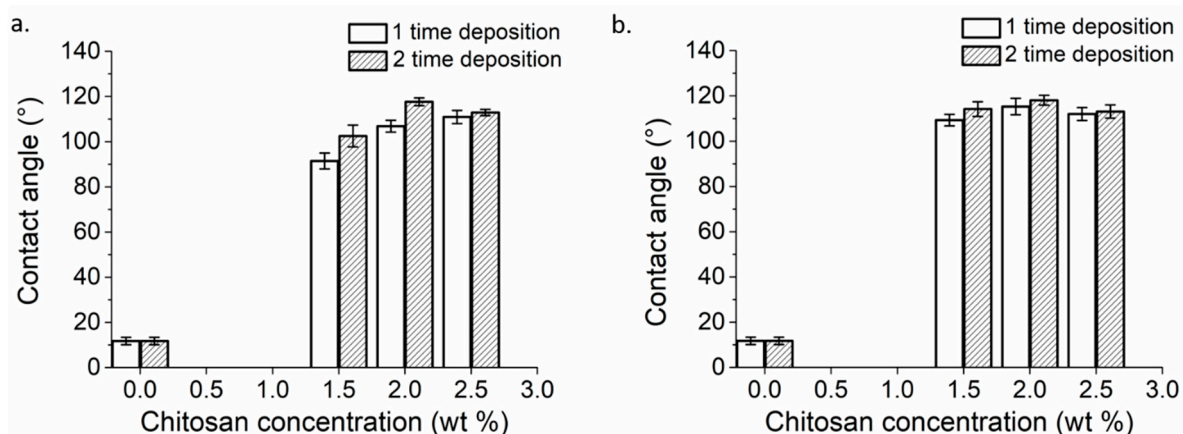

**Figure S1.** Water contact angle data for chitosan solutions with different concentrations deposited 1 time and 2 times on (a) 5–12  $\mu\text{m}$  pore-sized and (b) on 12–15  $\mu\text{m}$  pore-sized paper substrates.

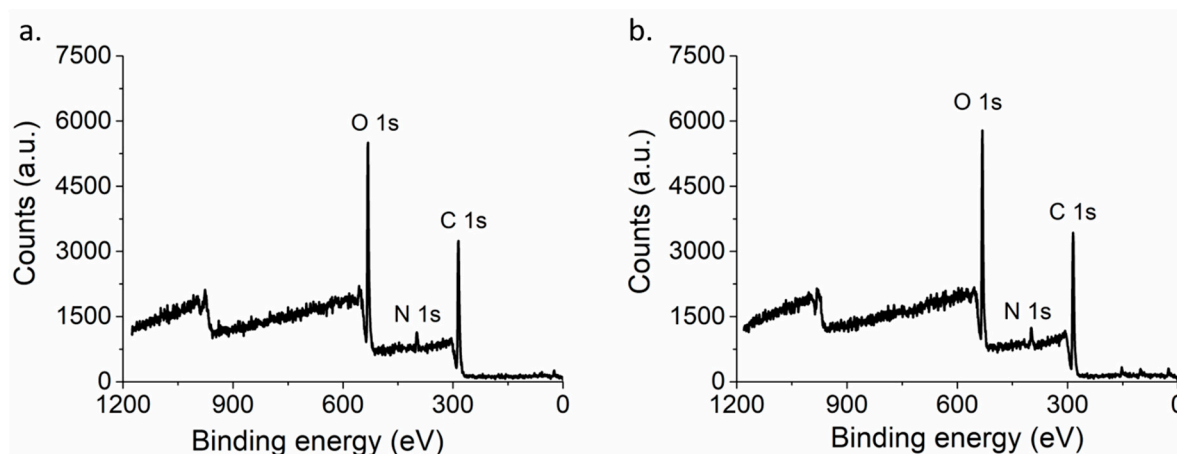

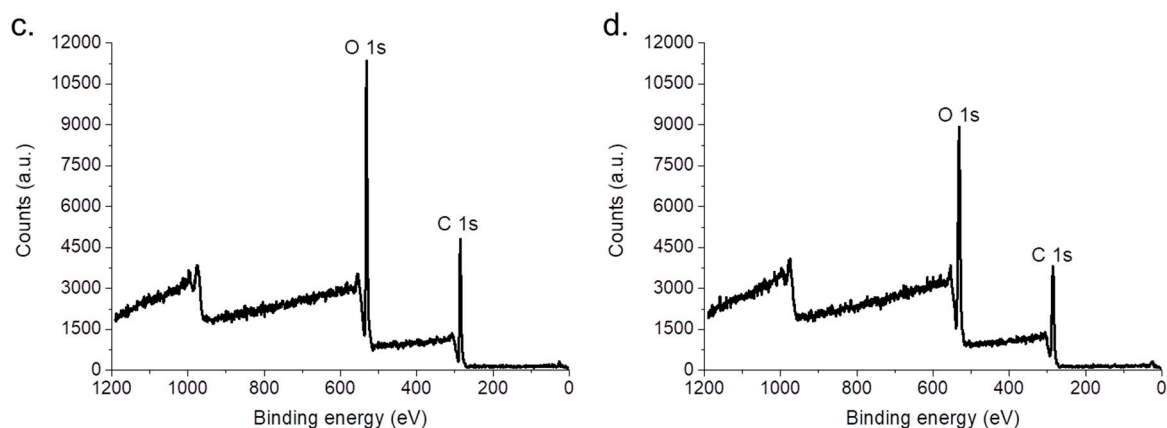

**Figure S2.** XPS survey scan of chitosan-modified paper (a) one and (b) two depositions from 1.5 wt% chitosan solution in acetic acid) as well as bare non-modified paper (c) and (d) on different sides of the paper).

**Table S1.** Binding energies and the atomic concentration of C1s, O1s and N1s for one-time deposition and two-times deposition.

| Name | Binding Energies Position (eV) |                      | Atomic Concentration (atom-%) |                      |
|------|--------------------------------|----------------------|-------------------------------|----------------------|
|      | One time Deposition            | Two Times Deposition | One time Deposition           | Two times Deposition |
| C1s  | 284.9                          | 285.6                | 63.6                          | 63.1                 |
| O1s  | 531.9                          | 533.1                | 31.0                          | 33.0                 |
| N1s  | 398.9                          | 400.2                | 3.4                           | 3.8                  |

**Table S2.** Assignment of most prominent bands observed in ATR-FTIR spectra for chitosan films on paper (2 coatings, 1.5 wt %) and chitosan on paper (2 coatings, 1.5 wt %) grafted with chromogenic substrate X-Gluc.

| Vibrations and Assignments    | Chitosan |            | Chitosan Grafted |
|-------------------------------|----------|------------|------------------|
|                               | Data     | Refs S1,S2 | X-Gluc           |
| $\nu_s$ (O-H, N-H)            | 3334     | 3435–3330  | 3335             |
| $\nu$ (C-H) aromatic          | -        | -          | 3074             |
| $\nu$ (C = O) amide I         | 1645     | 1620–1655  | 1641             |
| $\delta_b$ (NH <sub>2</sub> ) | 1599     | 1590–1610  | -                |
| $\nu$ (N-H) amide II          | 1553     | 1550–1565  | 1557             |
| $\delta_b$ (C-H)              | 1375     | 1375–1382  | 1376             |
| $\nu_s$ (C-O-C)               | 1053     | 1065–993   | 1065             |
| $\nu_s$ (C-O-C bridge)        | 896      | 890–900    | 898              |

- S1. Kasaai, M. R. A Review of Several Reported Procedures to Determine the Degree of N-Acetylation for Chitin and Chitosan Using Infrared Spectroscopy. *Carbohydr. Polym.* **2008**, *71*, 497-508, DOI: 10.1016/j.carbpol.2007.07.009.
- S2. Rahman, N. A.; Abu Hanifah, S.; Mobarak, N. N.; Su'ait, M. S.; Ahmad, A.; Shyuan, L. K.; Khoon, L. T. Synthesis and Characterizations of o-Nitrochitosan based Biopolymer Electrolyte for Electrochemical Devices. *PLOS ONE* **2019**, *14*, e0212066, DOI: 10.1371/journal.pone.0212066.

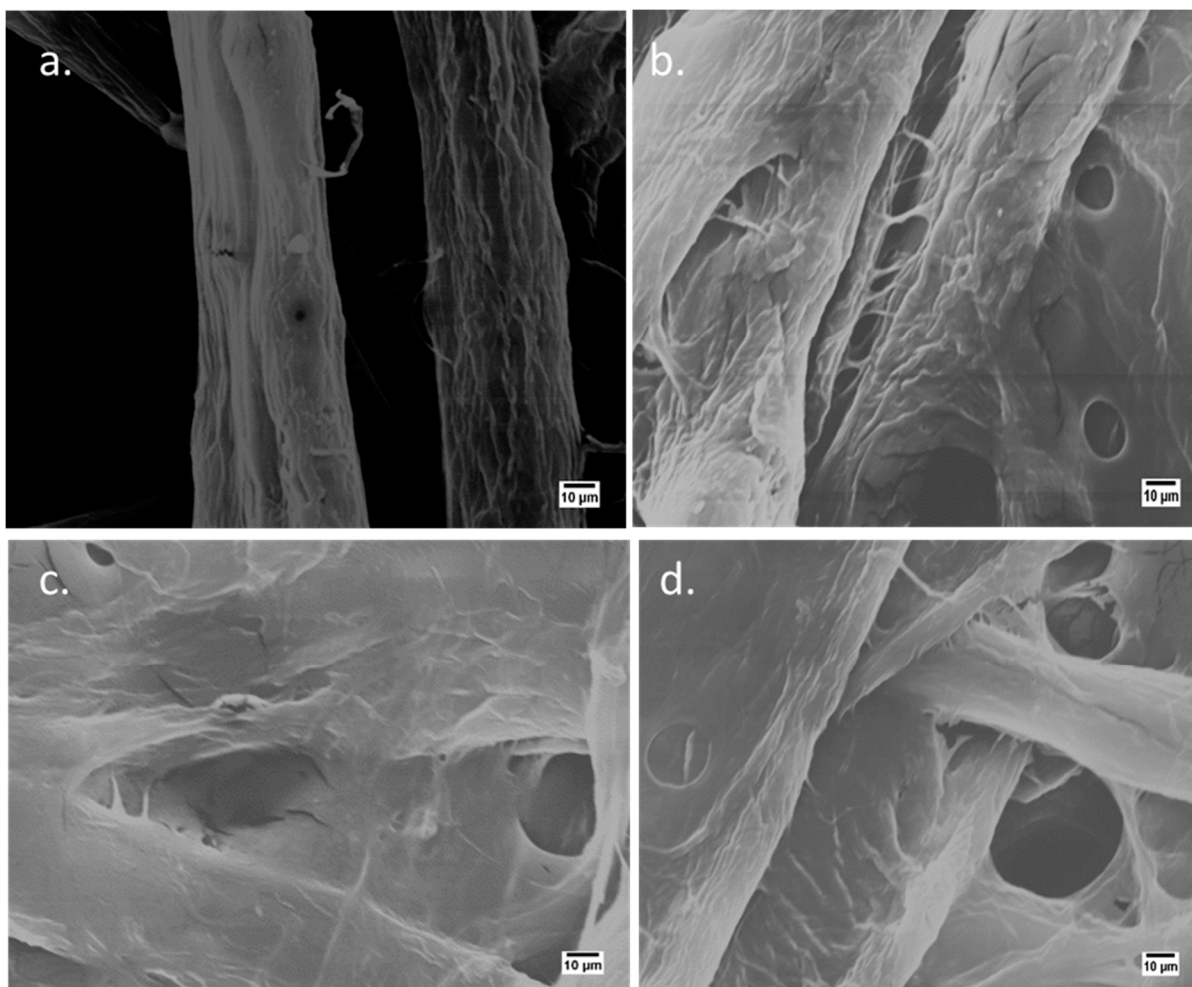

**Figure S3.** Field-emission scanning electron microscopy (FESEM) images of sensor paper: (a) uncoated paper and (b) paper coated with 1 wt%, (c) 1.5 wt% and (d) 2 wt% chitosan solution, 5–12  $\mu\text{m}$ .

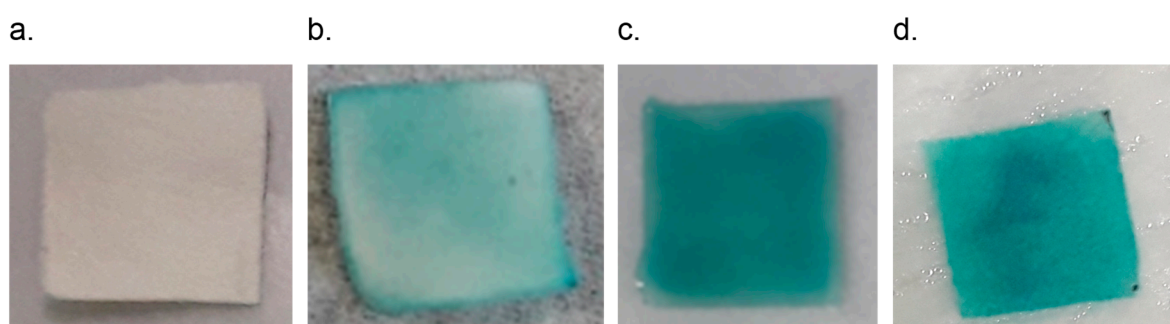

**Figure S4.** Photographs of sensor hydrogel coated paper after reaction with enzyme: (a) uncoated paper control, (b) X-Gluc functionalized paper (one-time chitosan deposition) tested with bacteria suspension with bacteria concentration of  $1.3 \times 10^7$  CFU/mL, (c) X-Gluc functionalized paper (two times chitosan deposition) tested with bacteria suspension with bacteria concentration of  $1.3 \times 10^7$  CFU/mL, (d) X-Gluc functionalized paper (two-times chitosan deposition) tested with in neat enzyme solution (1  $\mu\text{M}$ ) phosphate-buffered saline (PBS) prepared by dilution of DPBS. The incubation time was in all cases 4 h.

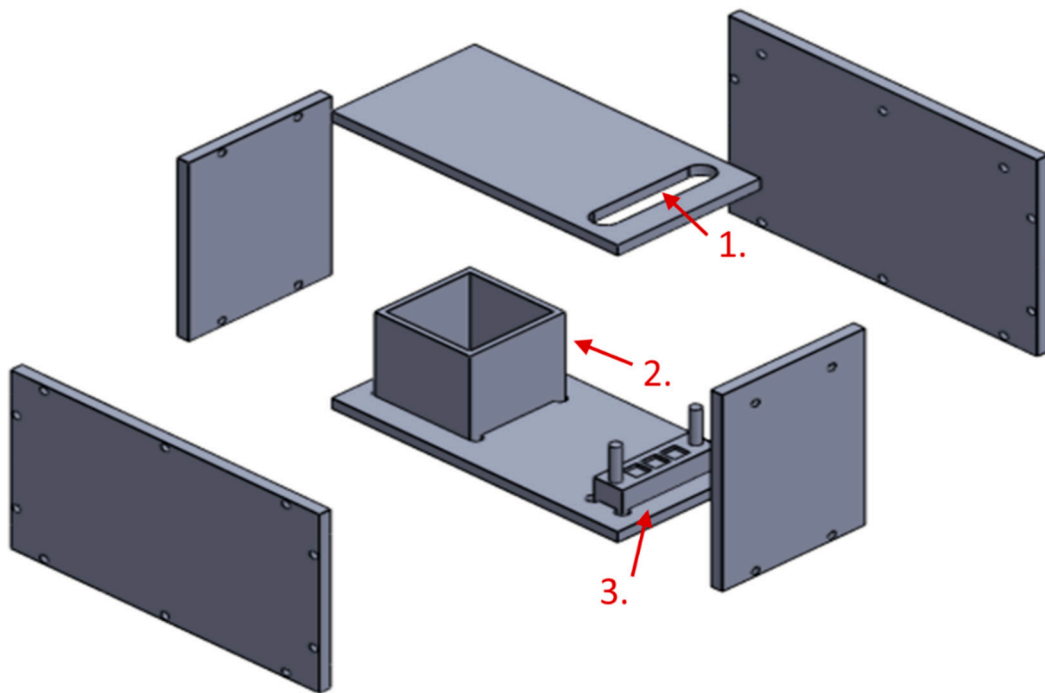

**Figure S5.** Schematic of the black box design. The box possesses (1) a camera hole and (2) a platform to hold the smart phone, a water-reservoir chamber and a sample holder, where (3) paper supported samples of a diameter of 8 mm fit in and can be easily detached for cleaning in case of contamination. The box was designed and drawn using inventor drawing software.
